# Supplementary material
Source: Springer Nature journal article supplement (https://www.springermedizin.de/resource/supplementary/12889_2002_41_MOESM3_ESM.pdf/9500166)
Supplement: MOESM3 [file 9500166]

### **Additional file 3: Sources of notifications of potential stroke events with onsets between 1/5/2000 and 30/4/2001, with outcomes of initial and neurological assessments**

|                                                                   | <b>Rural</b> | <b>Urban</b> | <b>Total</b> |
|-------------------------------------------------------------------|--------------|--------------|--------------|
| <b>a) Sources of all notifications of potential stroke events</b> |              |              |              |
| Ambulance service                                                 | 101          | 383          | 484          |
| GPs                                                               | 124          | 52           | 176          |
| Other Primary (incl emergency rooms)                              | 46           | 231          | 277          |
| Hospitals                                                         | 88           | 82           | 170          |
| Neurologists outside hospitals                                    | 14           | 27           | 41           |
| Death certificates, autopsies                                     | 199          | 498          | 697          |
| Miscellaneous                                                     | 71           | 12           | 83           |
| <b>Total notifications</b>                                        | <b>643</b>   | <b>1285</b>  | <b>1928</b>  |
| <b>Events giving rise to notifications</b>                        | <b>518</b>   | <b>1068</b>  | <b>1586</b>  |
| <b>Persons giving rise to events*</b>                             | <b>501</b>   | <b>1026</b>  | <b>1527</b>  |
| <b>b) Initial assessments of suspect stroke events</b>            |              |              |              |
| Residentially ineligible                                          | 59           | 447          | 506          |
| Less than 35 years of age                                         | 0            | 3            | 3            |
| Unequivocally not stroke                                          | 30           | 51           | 81           |
| Unequivocally not first in lifetime                               | 50           | 123          | 173          |
| Abandoned                                                         | 1            | 16           | 17           |
| Other                                                             | 3            | 10           | 13           |
| Total not referred                                                | 143          | 650          | 793          |
| <b>Referred for assessment by neurologists</b>                    | <b>375</b>   | <b>418</b>   | <b>793</b>   |
| Discovered <sup>†</sup> to be ineligible by residence or age      | 16           | 35           | 51           |
| <b>c) Outcome of neurological assessments</b>                     |              |              |              |
| Confirmed to be eligible by residence and age                     | 359          | 383          | 742          |
| Recurrent stroke                                                  | 69           | 64           | 133          |
| Not stroke                                                        | 89           | 101          | 190          |
| Insufficient information                                          | 13           | 17           | 30           |
| <b>First in lifetime stroke</b>                                   | <b>188</b>   | <b>201</b>   | <b>389</b>   |
| <i>Of which, aged 45 to 84</i>                                    | <i>167</i>   | <i>184</i>   | <i>351</i>   |

\* events with onsets separated by 28 d or more qualified as independent events

<sup>†</sup> at neurological assessment
